# Supplementary material for: A novel optical thermometry strategy based on emission of Tm3+/Yb3+ codoped Na3GdV2O8 phosphors
Source: Royal Society of Chemistry journal article supplement (doi:10.1039/d1dt03747a), 2022-01-01
Supplement: d1dt03747a1.pdf [file d1dt03747a1.pdf]

# Supporting Information

## **A novel optical thermometry strategy based on upconversion emission of Tm<sup>3+</sup>/Yb<sup>3+</sup> codoped Na<sub>3</sub>GdV<sub>2</sub>O<sub>8</sub> phosphors.**

Kamel Saidi\*<sup>1</sup>, Mohamed Dammak<sup>1</sup>, K. Soler-Carracedo<sup>2</sup>, Inocencio R. Martín<sup>2</sup>

<sup>1</sup> Laboratoire de Physique Appliquée, Groupe des Matériaux Luminescents, Faculté des Sciences de Sfax, Département de Physique, Université de Sfax, BP, 1171, Sfax, Tunisia.

<sup>2</sup> Departamento de Física, Universidad de La Laguna, Apartado 456, 38200 San Cristobal de La Laguna, Santa Cruz de Tenerife, Spain.

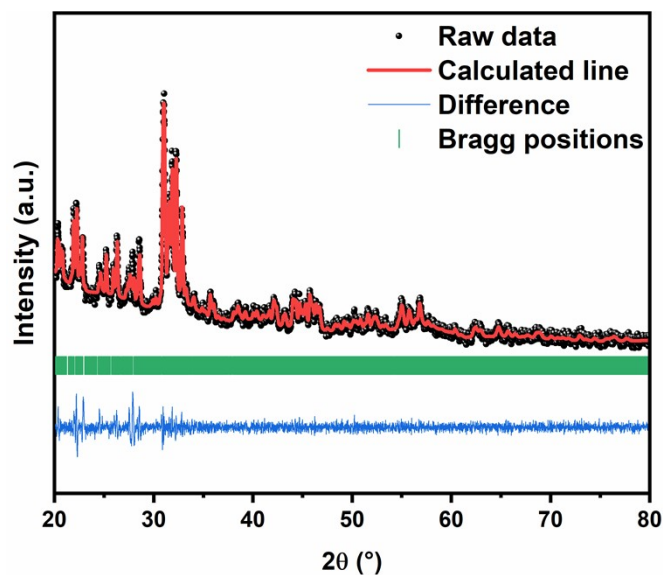

**Fig. S1** Rietveld refinement profiles of the XRD pattern of the NGVO: Yb<sup>3+</sup>, Tm<sup>3+</sup> phosphor.

**Table S1.** Crystallographic Data of NGVO codoped Tm<sup>3+</sup>/Yb<sup>3+</sup> from the Refinement.

| NGVO Tm <sup>3+</sup> /Yb <sup>3+</sup> |
|-----------------------------------------|
| Cryst syst: monoclinic                  |
| Z= 24                                   |
| Space group P2 <sub>1</sub> /c          |
| a = 29.5852 Å b= 11.2895 Å c= 14.1039Å  |
| α=90° β = 91.9041° γ=90°                |
| V= 4708.1640 Å <sup>3</sup>             |
| Rwp= 10.21                              |
| X <sup>2</sup> =1.73                    |

**Table S2.** Values obtained for the coefficients of the fittings to Eq. 2 for the LIR results.

| <b>LIR</b>                          | <b>Values of coefficients</b>                                                      |
|-------------------------------------|------------------------------------------------------------------------------------|
| <b>LIR<sub>1</sub> (800/475nm)</b>  | A = -394.04<br>B = 303.44<br>C = -0.3110 <sup>-2</sup><br>D = 2.3910 <sup>-6</sup> |
| <b>LIR<sub>2</sub> (1625/475nm)</b> | A = -216.81<br>B = 108.59<br>C = -0.3110 <sup>-2</sup><br>D = 2.4210 <sup>-6</sup> |
